# Supplementary material for: Early Changes in Transcriptomic Profiles in Synaptodendrosomes Reveal Aberrant Synaptic Functions in Alzheimer’s Disease
Source: MDPI journal article supplement (doi:10.3390/ijms23168888), 2022-08-10
Supplement: s1 [file s1]

Supplementary Table S2. Primers for real-time quantitative polymerase chain reaction analysis.

| Target Gene | Directions | Sequences             | Accession No.  | Product Size |
|-------------|------------|-----------------------|----------------|--------------|
| Rpl41       | Forward    | ggaagaagagaatgcgcagg  | NM_018860.4    | 142          |
|             | Reverse    | gcacacagtcctgatagcttg |                |              |
| Usmg5       | Forward    | agaaaactccagctgcgaaa  | AJ290947.1     | 216          |
|             | Reverse    | atggggattggtatggagcc  |                |              |
| Mt1         | Forward    | ggacaggaagcagaggtctt  | NM_013602.3    | 155          |
|             | Reverse    | gttcgtcacatcaggcacag  |                |              |
| Mt2         | Forward    | ctttgcgctcgaccaata    | NM_008630.2    | 224          |
|             | Reverse    | cagcagcttttcttcgagga  |                |              |
| Ndufa4      | Forward    | gcatcccagcttgattcctc  | NM_010886.3    | 141          |
|             | Reverse    | cccagtttgtccatggctc   |                |              |
| Rps23       | Forward    | aaagtaggggtgaggccaa   | NM_024175.3    | 205          |
|             | Reverse    | ccttaaagcggactccagga  |                |              |
| Chchd2      | Forward    | aagcccgacatcacttacca  | NM_024166.6    | 132          |
|             | Reverse    | ctcacagagcttgacatcgc  |                |              |
| Mrpl42      | Forward    | tcccctacgaacacaccaaa  | NM_026065.4    | 135          |
|             | Reverse    | gttctatcatgggcccttc   |                |              |
| Rpl29       | Forward    | gcacaacaagaaaggcctga  | NM_001324534.1 | 120          |
|             | Reverse    | ccttttggcatcttgggctt  |                |              |
| Adnp        | Forward    | gcgttcactcgaaaaggag   | NM_001310086.1 | 171          |
|             | Reverse    | aacggcaatacggacaagac  |                |              |
| Gfap        | Forward    | agaaaaccgcatcaccattc  | NM_010277.3    | 184          |
|             | Reverse    | tcacatcaccacgtccttgt  |                |              |
| Eif3a       | Forward    | actccctgggtcaagtctct  | NM_010123.3    | 157          |
|             | Reverse    | cacatagcttgcggaactca  |                |              |
| Hnrnpa1     | Forward    | aaccgacgagagtctgagga  | NM_010447.5    | 157          |
|             | Reverse    | gtgtggtctgcattcatgg   |                |              |
| Psma1       | Forward    | tggagtgaatttgatgaa    | NM_011965.2    | 245          |
|             | Reverse    | cattggtcatcggcctttt   |                |              |
| Hadhb       | Forward    | gagctgttcttcccaactgc  | NM_001289798.1 | 182          |
|             | Reverse    | aacccgaaagtgcagctcta  |                |              |
| Tnfsf13     | Forward    | tcaggtggtatctcggaag   | NM_023517.2    | 195          |
|             | Reverse    | aatgttccatgcggagaaag  |                |              |
| Kcna2       | Forward    | cccaagaaacggatgaggtta | NM_008417.5    | 206          |
|             | Reverse    | tcatcctcccgaaacatctc  |                |              |
| Ppp1r3C     | Forward    | gtggggactgacaccagagt  | NM_016854.2    | 231          |
|             | Reverse    | agtacatgcacaccggacaa  |                |              |
| Pcp4        | Forward    | ggtgaatgcctctcattggt  | NM_008791.3    | 151          |
|             | Reverse    | actcatgttggcctgactcc  |                |              |
| Ube2m       | Forward    | ctcagcgatgggaaatgaat  | NM_145578.3    | 185          |

|       |         |                      |                |     |
|-------|---------|----------------------|----------------|-----|
|       | Reverse | aggccatgcagtaacattcc |                |     |
| Rnf20 | Forward | cgacattgtgagctggagaa | NM_001163263.1 | 178 |
|       | Reverse | gggcttcaactgcagact   |                |     |
| Rif1  | Forward | cctgccaatttgaacaggt  | NM_175238.6    | 232 |
|       | Reverse | tcattccagtcccaaaagc  |                |     |
