# Supplementary material for: Early Changes in Transcriptomic Profiles in Synaptodendrosomes Reveal Aberrant Synaptic Functions in Alzheimer’s Disease
Source: Int J Mol Sci. 2022 Aug 10;23(16):8888. doi: 10.3390/ijms23168888 (PMC9408306; doi:10.3390/ijms23168888)
Supplement: Supplementary file 1 [file ijms-23-08888-s001.zip › Qu et al._Supplementary Table S1.xlsx]

## Sheet: 3-month old DEGs
tracking_id	Fold Change (FC)	P_value
Gpr146	1.50592	0.000105403
Hspa9	1.20798	0.000120587
Gfap	4.41926	0.000148611
Ccdc64	5.64957	0.000244197
Pepd	0.717393	0.000343009
Tubb5	1.21755	0.000499365
Hivep2	0.806292	0.000619342
Dab1	1.21109	0.000733736
Rabepk	0.739993	0.000969123
2900055J20Rik	3.88589	0.00141021
Narf	0.621717	0.00180276
Prnp	3.55879	0.00181667
Arl4c	0.81499	0.00226295
Inpp5a	0.702203	0.00235202
Psma1	0.345752	0.00237742
Chchd2	1.4012	0.00243244
Gng12	1.23042	0.00253902
Myeov2	1.97017	0.00254861
Ube2m	2.48963	0.00267556
Ap3m1	0.589591	0.00273844
Fam3a	1.51361	0.00304027
Dennd5a	1.25013	0.00311653
Unc119b	0.605201	0.00321379
Wdr83	0.355411	0.00342927
Inafm1	1.21161	0.0035183
Amfr	1.21715	0.00381268
Bbs5	0.671259	0.00385858
Pcdhgb6	2.17269	0.00388549
Rgs7	1.33676	0.00412052
Mrpl41	0.44974	0.00412231
Dpy19l1	0.81635	0.00422212
Pdgfb	0.478268	0.00430975
Adrb1	0.55367	0.00442994
Lonrf2	0.630429	0.00459066
Nup43	0.523904	0.00474949
Atp5g3	1.43826	0.00490635
Ell2	1.54657	0.0050122
Zfp560	1.51031	0.00516062
Kdm4a	0.658984	0.00593516
Ext2	0.509197	0.00611177
Otud6b	0.798189	0.00630134
Cox6c	0.677448	0.00642046
Pet100	1.24874	0.00649003
Sf3b2	1.36649	0.00654702
Dph6	0.469079	0.00662587
0610040B10Rik	1.76627	0.00673449
Mterf2	0.429578	0.00684838
Rsrc2	1.57518	0.00685575
Agpat4	0.505404	0.00732833
Hnrnpa1	0.432278	0.00732932
1110059E24Rik	0.690476	0.00758108
Rpl29	1.49158	0.00762979
Mt1	0.40788	0.00781949
Vps45	0.492886	0.00783458
Ak6	0.461551	0.00785364
Ppfia1	1.27122	0.00789655
Rnf113a2	2.60462	0.00811901
Orc3	0.764732	0.00816782
Xrcc4	0.680531	0.00872667
Rprd1a	0.700598	0.00876254
Tax1bp1	1.34282	0.00878174
Pmch	0.462194	0.00912111
Spryd4	0.497175	0.00918021
Rhbdd3	1.41693	0.0093245
Gmppb	0.508731	0.00955775
1700012D01Rik	2.0291	0.0095708
Aven	1.92365	0.00960518
Mdm2	0.592878	0.00966547
Ppp4c	0.765975	0.00997432
Plekhg5	1.53178	0.0102864
Nqo2	0.70979	0.0104513
Slc44a1	0.75963	0.0104764
Ctu1	1.46173	0.0106953
Mpp1	0.646785	0.0112006
Mars2	0.612776	0.0112161
Ccl12	2.56932	0.0113469
Tctn2	0.636148	0.0115073
Bex4	1.67213	0.0116434
Glipr2	0.434333	0.0127295
4833439L19Rik	1.21276	0.0129974
Sh3bp5l	0.597251	0.0131778
Nadk	0.718971	0.013268
Pcp4	0.603252	0.0133072
Snap29	0.78148	0.0134952
Dmap1	0.53531	0.0137418
Rgs8	0.652354	0.013744
Psma7	0.763793	0.014857
Hmgb1	1.403	0.0154759
Immp2l	0.670807	0.0156361
Fam114a2	1.53031	0.0157662
Gm6402	0.50908	0.015893
1500012F01Rik	1.50673	0.0159158
Spryd3	0.794496	0.0160441
Tmbim4	1.43389	0.0171808
Eif3l	1.40855	0.0173285
Ndufc1	1.5224	0.0173502
Rnf20	1.33493	0.0173522
Zeb1	1.38652	0.0176483
Dctd	0.675412	0.0176682
Slc25a12	0.779762	0.0177768
Scg5	0.415245	0.0181794
Synrg	0.605742	0.0184381
Rad23b	1.24679	0.0184824
Tia1	1.35993	0.0185519
Bud31	0.368835	0.0185701
Pttg1ip	1.43679	0.0187986
Stox2	1.33892	0.0192942
Eif3a	1.56128	0.0193262
Metrnl	0.436676	0.0194528
BC023829	0.351743	0.0198148
Rpe	0.663162	0.0201713
Coa7	0.673269	0.020208
Rybp	0.607047	0.020242
Pnpla8	1.36674	0.0211104
Rps23	0.661899	0.0211583
Phf6	1.20746	0.021552
Hat1	0.679438	0.0219418
Ctnna2	1.33864	0.0222306
Ctdsp2	1.28406	0.0222829
5730408K05Rik	2.08755	0.0226934
Peg13	0.636637	0.022808
Hadhb	1.88348	0.0231177
Mical3	0.665817	0.0232041
Zfp35	0.432231	0.0232076
Mcu	0.647759	0.0237157
Rpl26	0.412993	0.0238319
Arcn1	0.773998	0.0240241
Abce1	0.592598	0.0241387
Ppt2	0.453016	0.0241645
Ap5s1	0.483143	0.0242717
Zfp622	1.46504	0.0243785
Chrna7	0.31293	0.0243929
Ndufa2	1.21629	0.0244853
Otub2	0.619569	0.0245418
Rab8a	0.748733	0.0246972
Gmfb	0.700346	0.0254758
Mta2	1.22973	0.0254847
Ank3	1.36178	0.0256057
Ccdc47	1.29841	0.025705
Sh3bp5	1.33083	0.0258558
Ttc4	1.62199	0.0259418
Psip1	1.32499	0.0259662
Arhgap12	1.39642	0.0260265
Mrpl32	0.729558	0.026236
Tcea1	0.533984	0.0263034
Atp13a1	1.64124	0.0265574
Adnp	3.06779	0.0270984
Psmb9	0.703781	0.0273143
Mrpl42	0.633195	0.0273844
Rps7	0.706534	0.0275045
Tmem141	0.66328	0.0275564
Lhfpl2	1.80022	0.0279514
Dusp18	0.729993	0.0281559
Cst3	0.703543	0.0282578
Rps4x	0.468511	0.0283661
Akap12	1.62269	0.0285614
Trappc3	0.714536	0.0288568
Rnf168	1.83786	0.0288937
Setd5	0.683099	0.0294769
Srrm1	1.39377	0.0298359
St6galnac5	1.28723	0.0300629
Nprl2	0.553307	0.0303248
Fam98b	1.39557	0.0304072
Mad2l1	0.537792	0.0306355
Nupl1	0.707741	0.0312119
Amd2	0.213079	0.0313656
Sqstm1	1.20297	0.0315717
Resp18	0.352523	0.0316303
Tigar	0.633556	0.0319825
Tk2	0.609876	0.0328129
Tmem183a	0.800576	0.0328684
Zfp521	1.42402	0.0329593
Pde10a	0.666704	0.0330763
Sbsn	2.14057	0.0331183
Ccni	1.64734	0.0336978
Acbd7	1.99948	0.0337197
Nudt18	0.632487	0.0337311
Ska2	0.65763	0.033898
Ppp1r3c	0.678528	0.0339419
Rfx4	1.21356	0.0339697
Olfml3	1.7996	0.0340099
Dlx6os1	0.633622	0.0341248
Tgfbr1	1.3757	0.0342129
Atp2b4	0.610466	0.0350063
Wdr20	1.62732	0.0351101
Slc25a36	0.553202	0.0351686
Ccdc93	0.650596	0.0353604
Taf9	0.743407	0.0365054
Ccdc32	0.730914	0.03673
Yipf2	0.464759	0.0368323
Sssca1	0.299326	0.0374083
Mbd1	1.82586	0.0375676
3110045C21Rik	1.35977	0.0377898
Timm21	0.599859	0.0380552
Atp1a1	0.679151	0.0383865
Fam110b	1.48066	0.0384241
Vps9d1	1.20601	0.0387291
Ralgps2	0.588614	0.0388843
Cycs	0.572114	0.0397227
Nol6	0.713749	0.0409363
Atg5	0.756982	0.040996
Pdcd10	0.733069	0.0411627
Tpd52l2	0.751558	0.041218
Lgalsl	0.731191	0.0413757
Ndufa4	0.713405	0.0422044
Kcna2	0.735583	0.0427001
Kidins220	1.35188	0.0427272
Zdhhc2	0.568843	0.0431254
Fcf1	0.628838	0.0435169
Fam216a	0.581199	0.0442067
Mrps35	0.728457	0.0442312
2900008C10Rik	0.427646	0.0450011
Slc46a1	0.729425	0.0457024
Dcaf11	0.809554	0.0457741
Uros	0.616494	0.0460863
Wwp2	0.577383	0.0460903
Tmed10	0.797045	0.0461805
Stambpl1	0.482326	0.0463607
Fam19a4	0.426283	0.0465959
Gatad1	1.22554	0.0466502
Abcd3	1.22477	0.0470882
Cfap20	0.724234	0.0471104
Tmem25	0.475637	0.0473223
Abtb1	1.40292	0.0477041
Dnaja4	0.763745	0.0479517
Rad21	1.59505	0.0482211
Kcnip4	0.825785	0.0486121
Zeb2	1.28234	0.0488034
Elk1	0.792133	0.0489961
Upp1	0.571931	0.049221
Slc31a1	0.673981	0.0494082
Mat2a	0.51282	0.049536
Twistnb	0.606971	0.0496239
Tmem131	1.42075	0.0497948

## Sheet: 6-month old DEGs
tracking_id	Fold Change (FC)	P_value
Cap1	0.724988	3.34152e-06
Nmrk1	0.461146	0.000147378
Spef1	0.496435	0.000191806
Cfap36	1.85113	0.000296432
Peli1	1.6026	0.000320655
Setmar	1.69936	0.000369067
Thyn1	0.692601	0.000386654
Pdgfc	1.6438	0.000394294
Gpr137b	0.532273	0.000504059
Psmg2	0.445178	0.000691157
Emp2	1.3704	0.000759367
Enpp5	0.789735	0.000789447
Galnt4	2.44105	0.000791101
Fam49b	1.20873	0.000820662
Urod	0.557057	0.000831118
Foxred1	0.660019	0.000834421
Tmem129	1.20466	0.000971202
Lhx6	0.487947	0.000982187
Pfn4	0.372506	0.00109157
Mex3b	1.66482	0.0011275
Mtf2	1.45885	0.00113923
Rps19-ps3	0.221117	0.00118865
Sipa1l3	1.59691	0.00122482
Actr1a	0.744831	0.0012699
Pold2	1.71976	0.00130269
Tsc2	0.649046	0.00135271
Spcs2	0.697137	0.0015627
Nat8	0.581848	0.00159868
Nkain2	1.2098	0.00171942
Aif1l	1.94312	0.00176285
Oxa1l	0.693754	0.00177145
Cox8b	0.403827	0.00179653
Anxa3	0.656886	0.00190576
Srsf5	0.6872	0.00195964
Arpc3	0.649064	0.00205531
Rarres1	1.99665	0.00235553
Mt1	0.321312	0.00243689
Papss2	1.28986	0.00245988
Srsf9	0.758746	0.00246508
Tagln3	0.698846	0.00259562
9330179D12Rik	0.596629	0.0026064
Gpn1	0.76281	0.00265164
Rpp14	0.639442	0.00272764
Ccndbp1	0.811258	0.00273449
D10Wsu102e	0.638818	0.00275926
Srp9	0.827255	0.00284999
Tmem53	0.53523	0.00293413
Tspan13	0.827378	0.0029811
Mgst1	0.644187	0.00319781
Lpcat2	0.685614	0.00324946
Nt5c3	1.20217	0.00325988
Zfand5	1.22267	0.00331024
Crebzf	1.34333	0.00338079
Hadhb	1.5461	0.00341722
Msl3l2	1.41841	0.00347662
Lims1	1.20316	0.00366425
Bhlhe22	1.21168	0.00380786
Olfml3	3.22239	0.00397636
Nit2	0.585124	0.00398256
Dtl	0.621242	0.00401494
Cdc123	0.620265	0.00405146
Tbpl1	0.788817	0.00410507
Rbm45	0.684706	0.00412958
Ctsl	0.678229	0.0042396
Nubpl	0.601043	0.00424346
Psma1	0.615176	0.00427881
Psma6	0.786665	0.00432232
Ube2f	0.671557	0.00444739
Tle4	1.20654	0.00453815
Lynx1	0.740093	0.00458305
Rrs1	1.67637	0.00472001
Chmp2b	1.38411	0.00480174
Ulk2	1.22636	0.00483283
Slc25a25	0.818992	0.00498176
Micu1	0.746159	0.00506264
Cldn10	0.513961	0.00508616
Stx7	1.3884	0.00517535
Cox6b1	0.581968	0.00518911
Srsf2	1.31231	0.00526729
Wdr77	0.827587	0.00529755
Rnf2	1.47838	0.00539325
Slc25a4	0.706199	0.00542543
Sccpdh	0.805936	0.0056413
Ccpg1os	0.69682	0.00569695
Ppp1r3c	0.722478	0.00575929
Prorsd1	0.37316	0.00579733
Idh3g	0.700493	0.00592222
P2ry1	1.41119	0.00604726
Hspa2	1.42293	0.00618725
Zfp763	1.3478	0.00628832
Pik3c3	0.648802	0.00629045
Decr1	0.599156	0.00642115
Ctsb	0.810609	0.00643885
Tpr	1.22508	0.00644698
Ogfod3	0.573435	0.00660641
Ppp1r2	1.20029	0.00671583
Gm1976	0.602603	0.00675226
Prdx2	0.561873	0.00706714
Rngtt	1.21022	0.00710166
Churc1	0.755759	0.00714188
Uqcrc2	0.628611	0.00720033
Eny2	0.83184	0.00722647
Tapbp	0.478285	0.00733489
Top2b	1.20912	0.00752386
Cox6c	0.813106	0.00755059
Rbfox2	1.33166	0.00755238
Tmem18	0.749578	0.00768942
Dhrs7	0.615441	0.007801
Supt7l	0.382692	0.00782272
Gnrh1	5.67308	0.00789114
Zxdb	1.31746	0.00791992
Psmb1	0.63749	0.00793224
Nme5	0.350752	0.0079359
Myeov2	1.25751	0.00795007
Il18	0.613341	0.00797901
Srebf2	1.39521	0.00806167
Dpagt1	0.555377	0.00814988
Degs1	0.644947	0.00816534
E230029C05Rik	0.536695	0.0082418
Snurf	2.2026	0.00826598
Park2	0.576015	0.00839113
Camkk1	0.798019	0.00845144
Smu1	0.67532	0.00848491
Psmb7	0.64803	0.0087017
Smim20	0.560722	0.00871115
C230035I16Rik	0.315282	0.0088075
Tubb2a	0.8241	0.00888902
Gm6793	0.460236	0.00891327
Gdap1l1	0.713934	0.00920712
Lrrc42	0.698795	0.00926127
Ccdc64	3.78641	0.00932838
Kif21a	1.20809	0.00949606
Gm4349	0.51318	0.00958218
Ssu72	0.755835	0.00965263
H3f3b	0.82653	0.00965436
Bivm	1.46222	0.00965765
Mrrf	0.635582	0.00968792
Prdx6	0.827609	0.00973855
Anxa5	0.65535	0.00996441
Junb	1.56464	0.00998675
Nanos1	1.22828	0.010006
B3galt5	0.681759	0.010079
Fbxo33	1.59139	0.0101928
Zxda	1.48888	0.0102926
Ilf2	0.597825	0.0103025
Acat1	0.782537	0.0103638
Psma5	0.673068	0.0103691
Mrpl24	0.552987	0.010395
Dpcd	0.703475	0.010418
Gzf1	1.2008	0.0105306
Sf3b4	1.71939	0.0105324
Emc7	0.69751	0.0106951
2810025M15Rik	0.638531	0.0107261
Gm8615	0.474971	0.0107502
Hmgn3	0.71342	0.0110577
Zfp420	1.69552	0.0110603
Stt3a	0.599187	0.0111328
Satb2	1.20357	0.0112085
March2	0.828332	0.0112625
Ormdl2	0.693697	0.0113683
Ptrh2	0.73778	0.0116928
Abca1	1.40561	0.0117169
Lrp3	0.572383	0.0117902
Ppp3cb	1.25717	0.0119684
Dach1	1.51738	0.0120119
Rras2	1.55223	0.0120347
Rragc	0.809718	0.0120774
Mrps23	0.83174	0.0120977
Mknk2	0.767155	0.0121216
Sec14l1	0.82302	0.0121472
Plin3	0.635487	0.0122269
Adk	0.667448	0.0122995
Hnrnpa1	0.589787	0.0123008
Fahd1	0.611467	0.0123972
Bpgm	0.760071	0.0124178
Tprkb	0.830126	0.0124681
Ostc	0.694379	0.0125
Med22	1.25919	0.0126985
Polr1c	0.76354	0.0127336
Zfp281	1.37348	0.0127989
Ackr3	0.780648	0.0130321
Eif3a	1.46629	0.0130409
Rnpep	1.70786	0.0130703
Manf	0.696749	0.0132359
Rps3a1	0.730915	0.0132682
Tab2	1.5215	0.0133247
Zfp560	1.21222	0.0133454
Leprot	0.76029	0.0133888
Pantr2	0.574816	0.0133983
Rpl41	0.762242	0.0134837
Hnrnph3	0.704923	0.0134876
Kcnab2	0.832745	0.0135425
Alg14	0.572752	0.0136048
Sdccag3	0.665388	0.013629
Phlda1	1.50773	0.0136483
Dpy19l3	0.701502	0.0136685
Rnf111	1.24963	0.0137008
Kazald1	0.544273	0.0137316
Mrpl11	0.740848	0.0137542
Lrrtm3	1.21316	0.0137636
Eme2	2.3975	0.0137989
Dab2	1.44423	0.0138708
Uqcc3	0.52479	0.0139034
Kcna2	0.759614	0.0139744
Chst15	0.827617	0.0141366
Por	1.44368	0.0141841
1810013L24Rik	1.24218	0.0142032
Rad21	1.29637	0.0142098
Sdhd	0.591302	0.0143204
Pnma3	0.601594	0.014466
Ube2m	1.45225	0.0144753
Srebf1	1.37066	0.0146335
Atf2	1.24301	0.0146678
Dynlt1b	0.498723	0.0146751
Cisd1	0.691586	0.0146853
Wdr25	1.57624	0.0148241
Pgk1	0.575258	0.0148669
Pigc	0.692307	0.0149833
Grifin	10.7419	0.0150212
Fjx1	1.20256	0.0150671
Gm3086	0.235296	0.0151973
Srxn1	0.663428	0.0153599
Map4k3	1.23724	0.0156006
9130024F11Rik	1.71466	0.0156573
Gm6402	0.502402	0.0156933
Wdyhv1	0.773117	0.0157247
Rif1	1.46961	0.0158617
Glod4	0.761738	0.0159015
Mfsd5	0.830863	0.0160868
Sec22b	0.65447	0.0162937
Sec11c	0.729232	0.016429
Ndst2	1.66279	0.0164428
Hmox2	0.780954	0.0164668
Zfp120	1.72244	0.0164732
Tsfm	1.36224	0.0165252
Hnrnpc	0.826527	0.0166142
Cml1	0.622705	0.0166334
Dr1	1.3911	0.0167327
Pi4kb	0.706164	0.0168661
Txndc17	0.635016	0.0168675
Capn7	1.20275	0.0169377
Psmg1	0.691028	0.0171149
Rpl9	0.710143	0.01712
Nae1	1.31985	0.0172126
Rasl11a	0.295247	0.0172819
Sdf2	0.588236	0.0172885
Erlec1	1.69684	0.0173631
C230004F18Rik	0.599207	0.0173921
Ebp	0.552872	0.0176241
Gfap	2.15982	0.0176859
Tmem50a	0.503022	0.0177658
Cmtm4	0.781285	0.0177844
Caap1	1.46512	0.017855
Ifnar2	0.697793	0.0179047
Gstm5	0.619071	0.0180252
Gm2115	1.55189	0.0183089
Sall1	1.46679	0.0183235
Rbp1	0.66763	0.0183794
Atp5f1	0.748466	0.0188143
Fggy	0.58059	0.0188787
Rtn4rl1	0.6582	0.0190041
Chpf2	1.83889	0.0190411
Tlcd1	0.785933	0.0190465
Tspan33	2.07682	0.0191341
Txndc9	0.771255	0.0191547
Csnk2b	0.584095	0.0191594
Clp1	0.60271	0.0195163
Tmx2	0.580908	0.019522
Mthfsl	0.674216	0.0195499
Fam58b	0.804697	0.0196343
Glmp	0.810499	0.0197238
App	1.20067	0.0197324
Rpl29	0.388742	0.0198584
Zdhhc4	0.732341	0.0198815
Tmem9b	0.823096	0.0199405
	0.831298	0.0200614
Cryz	0.58858	0.0201197
Srp14	0.668948	0.0201458
Tshz1	1.60593	0.0202055
Mtfmt	0.559922	0.020231
St3gal3	1.57526	0.0202491
Naf1	1.30162	0.0202999
Dap3	0.811658	0.020437
Cd63	0.657836	0.0204599
Oat	0.703032	0.0205387
Adi1	0.734319	0.0207455
Mrpl22	0.678444	0.0207946
Arl6ip6	1.29979	0.020903
Ltc4s	0.369356	0.0209812
Gemin2	0.65715	0.0210672
Scpep1	0.437675	0.0211025
Maf	1.55827	0.021189
Plxna1	0.64897	0.0214392
Gabarapl1	0.829531	0.0215959
Dctn5	0.637184	0.0216116
Cmtm5	0.758464	0.0217589
Lmbr1	0.777666	0.0218687
Pcdhgb6	3.45478	0.0219385
Atp6ap1	0.809394	0.0219713
Calcrl	2.69367	0.0220496
Brca1	0.666183	0.0220866
Mphosph6	0.600902	0.0221162
Fam126a	1.24585	0.022221
Iws1	1.26142	0.0222441
Ldhb	0.690199	0.0222637
Phtf1os	1.30721	0.0223557
Ikbip	1.37979	0.0223845
Stard3nl	0.717616	0.0226224
Wdr82	0.82928	0.0228218
Zfp36l2	1.50293	0.0228584
Tmem130	0.600138	0.0228699
4933421O10Rik	1.74259	0.0229186
Vat1	1.72953	0.0229673
Hspa4	0.694073	0.02302
Commd3	0.671768	0.0230849
Srd5a3	0.698642	0.0231964
Creg2	0.704807	0.0232315
Ano4	1.56446	0.0232791
Fubp3	1.41759	0.0232859
Timm17a	0.537427	0.0233172
Esd	0.801432	0.0233529
Pdrg1	0.657266	0.0233743
Rps18	0.611676	0.0235853
Prkar1b	0.739949	0.0236238
Kat2a	0.723494	0.0236316
Selk	0.732998	0.023832
Akr1a1	0.766266	0.0238455
3110043O21Rik	0.790972	0.0238882
Wdr20	1.57769	0.0241948
Iah1	0.714841	0.0246079
Tmem127	0.6252	0.0246809
Cyb5a	0.708257	0.0247233
March5	0.828191	0.0248056
Tigd2	1.37639	0.0248151
Slc35a1	0.79292	0.0248328
Chchd2	1.65027	0.0251094
Sec13	0.682075	0.025171
Rab29	1.69272	0.0252148
Akap17b	1.25885	0.0252812
Stx18	1.45808	0.0252863
Gstk1	0.566912	0.0253456
Alas1	0.741512	0.0254053
Gnai1	1.23831	0.0254314
Trim3	0.816193	0.0254525
Atf1	1.29302	0.0256442
Ddo	0.683423	0.0257366
Atp6v1g2	0.692577	0.02584
Map3k1	1.37151	0.0258772
Nxph3	1.51326	0.0259165
Atad5	1.40485	0.0259241
Nrbp2	0.640096	0.0260982
Tle1	1.39037	0.0262827
Cox5b	0.600533	0.0262836
Slc35b1	0.483239	0.0262851
Dcp1a	0.81978	0.0263171
Pcp4	0.56083	0.0263177
Slmo1	0.802816	0.0263478
Dynlrb1	0.576299	0.0264272
Rpl10a	0.748102	0.0264771
Mrpl42	0.629896	0.0265718
Fam184a	1.47253	0.0266103
Gm3258	0.52256	0.0266175
Commd4	0.667158	0.0266868
Tbc1d15	1.43545	0.0267027
Sar1a	0.797416	0.0272052
Papolg	1.32905	0.027234
Cdh10	1.69941	0.0272633
Exoc6b	0.592719	0.0272777
Foxg1	1.20486	0.0272918
Gtf2e2	0.830501	0.0275295
Gm5148	0.581424	0.0278235
Vps25	0.68574	0.0278287
Cdk17	1.20986	0.0278747
Smc2	1.59779	0.0280015
Rps4x	0.631095	0.0282392
Cct8	0.746516	0.0282992
Clvs1	0.580764	0.0286453
Slc25a5	0.75022	0.0286777
Mrpl41	0.670093	0.0286932
Atg12	0.821125	0.0287615
Ifrd1	0.766788	0.0287874
Rnf20	1.21625	0.0288416
Mrpl48	0.719115	0.0289514
Vcp	0.830292	0.0291775
Aldh3a2	0.803985	0.0292093
Wipf1	1.35775	0.0292699
Pla2g16	0.676928	0.0293111
Gm19345	2.49136	0.0293678
Slc35f1	1.62285	0.0294894
Pdia4	0.70272	0.0295157
Slc29a3	0.546888	0.029527
Dguok	0.626467	0.0295678
Fcer1g	0.474401	0.0295886
Zfp563	1.43964	0.0296127
Gsto2	0.540384	0.0297572
Irgq	0.718515	0.0297997
Tardbp	0.829591	0.0298894
Timm23	0.648999	0.0299089
Slc15a4	0.805747	0.0299096
Tspan7	0.804569	0.0300627
Serinc3	0.788274	0.030101
Rabl3	0.441897	0.0301513
Plp2	0.420713	0.0302245
Hist3h2a	0.766463	0.03024
Cd68	0.604768	0.0303375
Higd1a	0.702865	0.0304589
Fam207a	0.768564	0.0305408
Dnajc9	1.26445	0.0306369
Psmd10	0.705593	0.0307001
Lsm14a	1.2126	0.0307193
Faf1	0.591546	0.030964
Chuk	1.48359	0.0311251
Yy1	1.29066	0.0312326
Gatc	2.82884	0.0312631
Zfp760	1.81503	0.0313115
Mpi	0.7176	0.0314348
Atp5o	0.642128	0.0316899
Lgals8	0.787318	0.031755
Cux2	1.57579	0.0319495
Enkd1	0.286323	0.0319933
Cul4b	1.26558	0.0320223
Map1lc3b	0.752023	0.0322526
Pon2	0.624759	0.0322936
Snrpd3	0.746661	0.0325024
Rdx	1.23691	0.0325153
Prdx3	0.728012	0.0325238
Zfp133-ps	0.634711	0.0327009
Zfp451	1.40791	0.0327193
Dhrs1	0.765102	0.0329329
Rnf7	0.714759	0.0329704
Arap2	1.26144	0.0330107
Resp18	0.617186	0.033156
Tmem218	0.640131	0.0332361
Fabp5	0.617929	0.033312
Ndufa4	0.790978	0.0333983
Abcc5	0.64633	0.0335465
Gm13446	0.608379	0.0336214
Coq6	0.615979	0.033733
Atp5c1	0.73156	0.0337392
Yrdc	1.30652	0.0340527
Sod1	0.62904	0.034428
Zfp397	1.3796	0.0345484
2810459M11Rik	1.65146	0.0345679
2310067B10Rik	0.759539	0.0345732
Bco2	0.630213	0.0349364
Pls1	1.56085	0.0349869
Thumpd3	0.798773	0.0350858
Hif1a	1.44121	0.0350972
Plxnb2	1.59362	0.0351169
Chchd5	0.717089	0.0351206
Maml2	1.54322	0.0352561
Rpl27a	0.732033	0.0353991
Slitrk5	1.37557	0.0354239
Pdzd11	0.621459	0.0355485
Bricd5	0.392967	0.0356238
Ipo13	0.707407	0.0356458
Gstm1	0.617748	0.0357742
Eif2a	1.38496	0.0358408
Rplp2-ps1	0.601563	0.0359414
Vps33b	1.52995	0.0359417
Tead1	1.53162	0.0360265
Gtf3c6	0.675042	0.0360561
Syap1	1.36152	0.0364167
Snapin	0.788091	0.0365509
Rerg	1.45284	0.0367238
Nrarp	1.65677	0.0369638
Tfdp1	1.20785	0.0369708
Zdhhc20	1.29595	0.0369757
Faim	0.707531	0.037069
Zfp329	1.51021	0.037191
Cblb	1.21736	0.0373403
Rnf182	1.24211	0.0373976
Man2c1	0.769516	0.0374405
1110032A03Rik	0.640632	0.0378048
Yipf1	0.760189	0.0379922
Ankib1	1.23097	0.038061
Nutf2-ps1	0.423276	0.0381637
Atp5a1	0.770172	0.0381975
9130011E15Rik	1.6417	0.0383085
Cyr61	1.6865	0.0384988
Msrb2	0.684936	0.038508
Ogdh	0.754663	0.0385573
Slc35e1	0.739954	0.038694
Ndufb9	0.810952	0.0387061
Desi2	1.20145	0.0387103
Prnp	2.41418	0.0387456
Tmem209	0.721263	0.0387784
2210016L21Rik	1.55758	0.0389306
Bcl11a	0.665388	0.0389822
Nupr1l	1.7995	0.0389951
Ufsp2	0.73112	0.0390596
Eif3g	1.37437	0.0390721
Tmem65	1.20403	0.0391011
Arl6ip1	0.708809	0.0391585
Nrd1	0.792488	0.0392517
Cst3	0.695125	0.0392563
Hist1h3e	0.372195	0.0393035
Phf5a	0.585817	0.0397805
Rnf219	1.2647	0.0399586
0610037L13Rik	0.582405	0.0400981
Tnik	1.27454	0.0402772
Pfdn2	0.606353	0.0403376
Ifi27	0.616101	0.0403674
Letmd1	0.811931	0.0404109
Metap1d	0.345288	0.0404114
Mafg	1.92351	0.0405445
Hsbp1	0.699366	0.0405599
Npm1	1.29535	0.0405786
Cox7a2l	0.738996	0.0406237
Tnrc6b	1.22546	0.0406393
Zfp286	0.696266	0.0406408
Usmg5	1.2541	0.0407996
Snf8	0.807735	0.0409415
Hsd11b1	0.746603	0.0409862
Trmt10a	1.59654	0.0411798
Ndufs4	0.693463	0.041389
Dffa	0.630915	0.041696
Gabpa	1.55524	0.0417122
Cxadr	1.45226	0.0417389
Mrpl47	0.721059	0.0417659
Flrt2	1.35753	0.0418174
Nhp2l1	0.737724	0.0418832
Rnf123	0.793624	0.041922
BC002163	0.730469	0.0420734
Ms4a6d	0.484222	0.0421463
5031425E22Rik	1.41927	0.0423812
Nckap5	1.2771	0.0427754
Plgrkt	0.611335	0.0427936
Nicn1	0.750025	0.0428145
Xpnpep1	0.672687	0.0431213
Ak2	0.686446	0.0432504
Tmem179b	0.612918	0.043288
Exosc7	0.52337	0.0433768
Rpl27	0.675668	0.043426
Matn4	1.6301	0.0437171
Cgrrf1	0.710119	0.0438476
Spryd4	0.597853	0.0438582
Uqcrfs1	0.779515	0.0438756
Adnp	1.98071	0.0439461
Tmem189	1.81195	0.0441066
Parl	0.687225	0.0441889
Iglon5	1.98605	0.0442277
Smim14	0.722362	0.044242
Cutc	0.625053	0.0443635
Psat1	0.749357	0.0443924
Tmem223	0.774119	0.0445149
Erh	0.671038	0.0445909
Sbsn	0.532409	0.0446482
Trim11	1.63664	0.0446901
Rpl7	0.819555	0.0447831
Rian	0.694615	0.0448415
Rpl10	0.707231	0.0450272
Mrpl35	0.786983	0.0451173
Slc46a3	0.796608	0.0451284
Npcd	0.474515	0.0451417
Rabggta	0.832303	0.0452581
Hsdl1	0.730987	0.0453547
Vps29	0.796412	0.0455179
Tmem63b	1.73809	0.0455244
Abhd10	0.819862	0.0457149
Sav1	1.2143	0.0457504
Laptm4a	0.774042	0.0459293
Ggct	0.64534	0.0460143
Cited4	1.87655	0.0461744
Nipsnap1	0.712999	0.0461775
Brox	0.797044	0.0465675
Rheb	0.793006	0.0466391
Tmem255a	1.41784	0.0469011
Scrib	1.55937	0.046955
Mdp1	0.776172	0.0470676
Fus	0.809193	0.0472796
Cd47	0.811211	0.0472999
Pde5a	0.75104	0.0473138
Frs2	1.31877	0.0473472
Ccdc82	1.32473	0.0473721
Zfp729a	1.49642	0.0475485
D330023K18Rik	0.592644	0.0478219
Mt2	0.586323	0.0479169
Gstt1	0.723076	0.0481335
C030023E24Rik	1.72047	0.0482329
Fnip1	1.48681	0.0486021
Vegfa	1.22932	0.0486723
Cinp	0.823383	0.0487427
2010315B03Rik	1.64718	0.0488607
Frs3	1.40678	0.048951
Pomp	0.644718	0.0491544
Mppe1	0.679881	0.0491582
Rps23	0.700628	0.0493073
Mfsd7b	1.36154	0.0493357
Tnfsf13	0.674253	0.0493595
Szrd1	1.76166	0.0494225
Zfp26	1.61582	0.0494471
Pla2g12a	1.62713	0.0496725
Sike1	0.806752	0.0497268
Ndufa12	0.793358	0.0497522
Coa3	0.761387	0.0499403
Pcnp	1.20098	0.0540013
Acbd7	4.3867	0.0562645
